# Supplementary material for: Short and long term representation of an unfamiliar tone distribution
Source: PeerJ. 2016 Aug 30;4:e2399. doi: 10.7717/peerj.2399 (PMC5012311; doi:10.7717/peerj.2399)
Supplement: Data S1 [file peerj-04-2399-s002.xlsx]

## Sheet: Sheet1
ParticipantNo	Pre_EnPn	Pre_EnPy	Pre_EyPn	Pre_EyPy	Post_EnPn	Post_EnPy	Post_EyPn	Post_EyPy	Pre_EnPn_RT	Pre_EnPy_RT	Pre_EyPn_RT	Pre_EyPy_RT	Post_EnPn_RT	Post_EnPy_RT	Post_EyPn_RT	Post_EyPy_RT	PercentCorrect	MusicTraining	MusEQ_daily	MusEQ_emotion	MusEQ_perform	MusEQ_consume	MusEQ_respond	MusEQ_prefer	STOMPreflexiveandcomplex	STOMPintenseandrebellious	STOMPupbeatandconventional	STOMPenergeticandrhythmic	GOLDactiveengagement	GOLDperceptualabilities	GOLDmusicaltraining	GOLDsingingabilities	GOLDemotions	GOLDgeneralsophistication	Age	Gender	Language	RightHanded	NormalHearing
101.00	10	16	11	29	14	15	10	19	1139.1	1348.69	1249.45	1051.76	1542.57	1535.53	1406.5	1537.42	0.775	7	5	4.69363	3.27297	2.54878	4.77174	5	4.22148	3.375	4.11698	5.47115	33	58	37	38	35	95	21	0	1	1	1
102.00	15	17	27	20	12	17	29	18	1734.2	1185.76	1330.33	1689.65	1456.83	1528.59	1708.21	1888.56	0.775	9	3.73394	4.40931	2.31758	3.69817	3.29348	5	3.51342	2.02083	4.73208	6.09135	42	55	37	32	32	91	19	1	1	1	1
103.00	4	18	2	22	7	21	12	23	2307.25	1233	995.5	1304.77	1443	550.619	684.333	865.435	0.825	6	3.82263	3.23284	1.39633	2.59756	3.31522	4.47982	3.77852	3.70833	4.43396	5.66827	23	35	20	25	21	48	18	1	0	1	1
104.00	16	15	25	17	18	16	20	18	517.812	704.8	732.56	671.529	361.833	794.312	587.85	363.778	0.7	2	4.6208	4.29412	2.45669	3.68293	3.80797	3.21973	4.43624	5.66667	4.94717	5.37981	43	47	21	23	32	65	21	1	0	1	1
105.00	21	11	6	15	13	27	10	24	592.048	505.909	568.167	521.2	650.923	574.111	346.2	505.708	0.8	4	4.12232	4.33824	2.99213	4.2622	3.78623	4.64574	5.65772	3.72917	3.17736	5	46	47	25	17	26	62	22	1	0	1	1
106.00	15	31	20	29	24	33	8	29	1283.53	520.77	716.75	880.483	496.625	728.45	899.375	731.379	0.75	10	4.2844	4.16176	#NULL!	2.79268	4.07246	3.51121	5.55705	#NULL!	5.78113	5.04327	21	39	28	28	30	62	26	1	0	1	1
107.00	4	32	11	31	1	40	17	31	967.5	583.2	355.273	577.645	1932	526	769.412	620.097	1	15	4.38532	4.31372	3.80577	3.93902	5	5	4.23825	2.375	3.95094	3.75962	41	63	39	40	36	103	20	1	0	1	1
108.00	8	12	6	20	7	27	14	29	361.75	1076.83	504.167	852.45	1377.14	985.148	1418.21	1008.52	0.9	9	2.31804	4.25245	3.15748	1.40244	3.77174	5	4.22819	5.10417	4.48679	5.00481	26	52	27	34	23	83	26	1	0	1	1
109.00	17	27	21	25	14	26	25	27	955.529	1050.5	1315.52	1112.24	908.357	915.88	884.64	1223.3	1	7	3.09174	4.0098	1.86089	3.74085	3.57609	4.73991	4.62752	4.77083	4.53962	3.375	30	44	15	24	23	54	22	1	2	1	1
110.00	29	35	27	33	35	40	38	39	1649.62	1556.89	1718.63	1514.88	1366.8	958.65	1154.92	1529.13	0.65	10	3.57492	4.20588	2.46194	3.70122	4.03261	4	5.5	4.4375	4.24528	5.46635	39	42	30	29	27	75	23	1	0	0	1
111.00	11	13	13	17	14	17	19	19	508.273	498.154	987.846	464.176	381.786	278.176	382.684	497.632	0.9	9	5	4.03922	3.7769	4.70732	3.10145	3.95964	4.56376	1.3125	4.00377	5.37981	52	45	34	19	29	70	20	1	0	1	1
112.00	25	24	5	3	38	39	36	39	1032.36	1476.12	3615.6	934.133	657.079	808.821	1182.44	666.846	0.7	10	3.93884	5.08824	4.74016	4.5	3.27899	3.86547	5.50671	4.375	5.96981	6.09135	50	47	38	32	30	88	24	0	0	1	1
113.00	17	2	19	21	19	36	27	25	696.706	673	700.316	594.905	704	584.389	487.926	522.84	0.45	12	4.38532	4.7451	3.46982	3.3689	4.24638	4.26009	4.16443	3.41667	4.11698	5.33173	42	51	42	38	34	97	21	1	1	1	1
114.00	24	26	18	23	23	24	16	19	727.125	703.115	697.167	660.304	885.435	948.792	897.812	963.316	0.55	8	5	4.7451	3.20735	4.09451	4.27899	5	4.16443	6.375	4.69434	3.86058	36	44	33	26	27	75	20	1	3	1	1
115.00	18	21	21	29	22	30	32	34	1551.5	1413.19	2506.71	1730.62	1300.68	1617.83	1731.06	1645.97	0.95	15	3.5474	4.80637	4.74278	4.62195	4.54348	4.64574	3.72819	4.77083	5.70943	4.66827	51	56	43	45	36	112	19	1	0	1	1
116.00	22	22	31	29	21	25	33	28	566.045	648.227	1061.52	828.517	794.238	699.12	616.909	739.357	0.65	9	4.66361	5.29167	3.53018	3.52134	4.77174	5	5.06376	3.375	5.46038	5.62019	40	53	32	35	33	84	18	1	5	1	1
117.00	17	26	14	17	12	32	14	26	2935.35	2618.12	5252.29	1734.47	2307.08	1467.62	1840.14	1613.5	0.8	6	4.30887	3.55882	2.13648	3.07622	3.05072	4.03139	4.50671	2.70833	5.6717	4.48077	30	45	28	22	27	65	22	0	0	1	1
118.00	7	26	15	35	8	27	13	34	1040.86	1145	1510.2	1027.51	2431.75	1471	2159.31	698.529	1	0	4.19572	4.53676	3.00787	3.39939	3.52536	4.38565	4.38591	4.75	3.43019	5.95673	40	49	30	29	30	81	23	0	4	1	1
119.00	28	17	19	22	31	21	23	24	907.786	926.529	1041.16	789.773	476.419	338.143	322.913	588.5	0.2	9	2.21407	3.01961	1.66667	1.82317	2.03623	3.64574	3.94295	2.70833	5.21509	4.17788	21	43	#NULL!	30	23	#NULL!	19	1	2	1	1
120.00	5	30	23	34	3	34	18	34	634.25	426.25	687.625	488.65	504.575	544.25	594.3	498.175	1	#NULL!	4.28135	4.33578	3.19423	3.61585	4.01812	4	5.21476	6.35417	3.50943	2.375	35	48	#NULL!	29	31	#NULL!	27	1	0	1	1
201.00	11	24	19	34	12	30	22	33	1362.27	918.125	1091.53	760.618	918.333	725.7	809.227	884.97	0.975	0	3	3.42157	2.4042	2.83232	2.01449	4	5.07718	5.6875	3.47925	3.57212	33	44	7	18	27	45	34	0	0	1	1
202.00	19	28	26	32	20	39	35	36	1697.84	1330.04	1459.54	1548.19	1343.9	1716.92	1805.57	1445.36	0.725	8	#NULL!	#NULL!	#NULL!	#NULL!	#NULL!	#NULL!	2.43624	3.0625	6.29057	3.86058	35	42	30	36	28	86	20	1	0	1	1
203.00	14	28	21	31	5	24	22	33	779	725.393	621.143	554	1622.2	671.208	797.818	565.212	0.975	9	4.09174	4.05637	1.79265	3.30183	4.05072	4	5	4.08333	6.25283	5.62019	34	46	#NULL!	30	26	#NULL!	21	1	0	1	1
204.00	19	25	13	15	21	19	17	21	883.368	487.04	1207.31	338.8	580.286	993.316	843	1580.48	0.4	16	3.0948	3.73039	3.94226	2.53659	2.76812	4	4.92953	3.08333	4.48302	4.50962	24	46	37	31	30	71	21	1	1	1	1
205.00	19	22	18	18	28	26	14	29	1387.95	1717.41	1183.11	1739.56	2162.57	2178.38	2942.86	1473.17	0.575	7	4.14985	4.93872	4.26772	3.57012	2.51087	5	5.57047	3.41667	5.92075	3.61538	49	50	37	29	31	90	20	1	1	1	1
206.00	14	25	16	31	12	30	21	34	1350.93	1405.76	938.938	1623.26	816.5	756.5	862.714	1129.76	0.525	8	3.12538	3.875	3.2126	3.16159	3.29348	4.64574	4.56376	4.70833	4.43019	3.71154	41	50	38	24	27	78	21	0	1	1	1
207.00	21	13	26	18	19	19	21	15	925.714	1102.2	910.962	1530.11	1180.74	1078.9	1151.29	1126.53	0.775	6	4.66361	4.08578	2.31496	4.09146	3.73188	4.38565	5.20805	3.375	3.69811	4.90865	41	44	34	26	32	76	19	1	0	1	1
208.00	29	32	25	24	31	34	38	34	723.655	626.062	1002.04	2055.25	809.226	847.529	827.105	628.118	0.825	6	4.00306	3.83088	4.15486	3.55793	2.8587	2.73991	5.65101	6.66667	4.23774	4.62019	52	#NULL!	34	39	32	99	18	1	0	1	1
209.00	23	17	24	19	30	15	23	23	1124.26	1405.82	1985.08	983.895	976.567	1537.87	1297.57	919.87	0.975	14	3.92661	5.28676	4.87139	3.18902	5	3.86547	4.62752	5.08333	2.78113	4.46635	41	53	#NULL!	40	33	#NULL!	18	0	0	1	1
210.00	23	25	18	30	22	19	22	22	1320.61	1888.72	1766.94	1256.33	2295.32	1964.84	1942.45	2393	0.625	6	4.66361	4.47059	4.66667	3.71646	4.26087	3.64574	5.27852	6.3125	2.47925	4.95673	50	54	44	41	32	104	20	0	0	1	1
211.00	16	26	19	24	21	29	28	23	617.562	1158.7	1556.53	1000.75	454.905	859.97	617.893	612.13	0.975	6	5	5.05637	3.47769	4.70732	3.75	4.73991	4.16443	5.4375	4.96604	5.42308	49	56	39	36	35	98	20	0	0	1	1
212.00	2	18	1	21	6	15	8	19	437.5	653.278	179	492.429	919.333	595.067	829	892	0.85	10	4.03364	3.10784	2.86089	2.65854	3.80435	3.64574	2.94966	5.10417	4.52076	5.04808	29	41	34	26	29	71	20	1	0	1	1
213.00	16	28	27	24	18	31	27	22	2026.81	1606.11	1956.78	3638.5	3645.56	2013.26	2457.48	2998.86	0.55	15	4.66361	4.17892	4.66667	4.85366	3.75	4.47982	5.10067	6.3125	5.70189	3.86538	51	58	40	41	33	106	24	1	0	1	1
214.00	26	18	26	25	25	25	27	26	1359.77	1960.39	1733.54	1429.16	817.44	823.08	807.667	912.5	0.625	7	4.01835	4.43628	4.67192	4.40854	4.03261	3.47982	4.93624	6.33333	3.76981	5.47115	47	48	30	30	32	84	21	0	0	1	1
215.00	13	15	8	19	21	20	21	25	667.769	707.133	1245.5	712.421	898.048	1416.7	874.048	1062.96	0.5	0	4.77982	4.60049	3.04462	3.98476	3.84058	4.47982	#NULL!	4.0625	3.72453	6	#NULL!	38	#NULL!	#NULL!	#NULL!	#NULL!	20	1	0	0	1
216.00	15	27	12	26	21	28	21	33	2822.73	1505.4	1581.17	1619.31	954.095	733.86	649.429	741.727	0.475	11	3.84098	4.59069	3.06562	2.81707	4.77174	2.73991	4.93624	5.39583	5.7283	5.42308	45	52	#NULL!	38	27	92	18	1	0	1	1
217.00	25	36	25	34	24	32	22	34	707	655.278	1018.48	548.5	1152.12	702.219	886.591	1023.71	0.9	12	4.45872	4.14706	4.66667	4.09146	3.82246	4.38565	6.14094	4.70833	5.77736	4.52885	50	59	41	40	32	108	19	1	0	1	1
218.00	16	8	8	7	7	7	5	5	599.5	530	528.125	362.143	731	548.143	1183.2	921.6	0.475	16	5	5.41667	3.99475	4.54573	5	5	3.17114	1.6875	6.0717	6.42308	51	50	32	34	34	91	21	1	0	0	1
219.00	5	20	9	40	0	18	5	35	1775.4	1458	1896.78	1365.22	999	1662.9	2614	1402.11	0.975	10	3.65443	4.1299	2.39108	3.27439	2.28261	5	3.07718	3.70833	3.41132	6.42308	44	56	32	32	29	89	20	1	0	1	1
220.00	22	27	21	38	21	31	23	33	1065.68	824.519	747.667	558.132	760.762	562.226	1135.17	496.667	0.75	7	4.77982	4.80147	5	4.69207	5	3.35426	6.21476	7	4.16604	6.66827	55	51	#NULL!	42	34	103	19	0	0	1	1
